# Supplementary material for: An expanded CRISPR–Cas9-assisted recombineering toolkit for engineering genetically intractable Pseudomonas aeruginosa isolates
Source: Springer Nature journal article supplement (doi:10.1038/s41596-023-00882-z), 2023-10-05
Supplement: MOESM1 [file 41596_2023_882_MOESM1_ESM12.xlsx]

## Sheet: Oligonucleotides
Supplementary Table S1. Oligonucleotides used in this study
Name	Sequence (5' - 3')	Tm (ºC)	Purpose
Routine primers used for checking the presence of ssr- and cas9-carrying plasmids
aaSSR-1F	TGAGCCAAGTAGCCAGGGTCG	60	Forward PCR primer to check the presence of the P. putida DOT-T1E ssr gene (~ 700 bp fragment)
aaSSR-1R	GATTTGTAGACGTTGGCAGCGCAG	60	Reverse PCR primer to check the presence of the P. putida DOT-T1E ssr gene (~ 700 bp fragment)
aaCas9-1F	AAGCACAAGTGTCTGGACAAGG	58	Forward PCR primer to check the presence of the S. pyogenes cas9 gene (~ 600 bp fragment)
aaCas9-1R	TCACTCAAACCTCCACGTTCAGC	58	Reverse PCR primer to check the presence of the S. pyogenes cas9 gene (~ 600 bp fragment)
Sequencing primer to check the insertion of the spacers into any pSN48∙CsR
SEVA-T0-F	GAACGCTCGGTTGCCGCC	62	Sequencing primer to check the correct insertion of the spacers. Note: if desired, a PCR could be also performed using the spacer's antisense-oriented oligonucleotide as reverse PCR primer
Example of specific oligonucleotides used for each specific genomic modification
- Gene deletions
pyrF-Pae-spc3-F	gcgcgAAACTGTGCCGGGTGAAGGT	-	Sense-oriented oligonucleotide to construct the specific spacer targeting pyrF (used for both PA14/PAO1 strains). Overhanging nucleotides for its cloning into the Eco31I restriction sites are depicted in blue
pyrF-Pae-spc3-R	aaacACCTTCACCCGGCACAGTTTc	-	Antisense-oriented oligonucleotide to construct the specific spacer targeting pyrF (used for both PA14/PAO1 strains). Overhanging nucleotides for its cloning into the Eco31I restriction sites are depicted in blue
pyrF-PAO1(+)-Rec	gattctgcgacaatgcgcgccgttttcgattcgccgcgagagagcccATGTGAggcggcttcccccacgcctgccgtcggcgaccgtcgcgcgccgtgtc	-	Recombineering mutagenic oligonucleotide to generate the clean deletion of pyrF in PAO1 (sense-oriented)
pyrF-PAO1(-)-Rec	gacacggcgcgcgacggtcgccgacggcaggcgtgggggaagccgccTCACATgggctctctcgcggcgaatcgaaaacggcgcgcattgtcgcagaatc	-	Recombineering mutagenic oligonucleotide to generate the clean deletion of pyrF in PAO1(antisense-oriented)
pyrF-PA14(+)-Rec	gattctgcgacaatgcgcgccgttttcgattcgccgcgagagagcccATGTGAggcggcttcccccacgcctgccgtcggcgaccgtcgcgcgtcgtgtc	-	Recombineering mutagenic oligonucleotide to generate the clean deletion of pyrF in PA14 (sense-oriented)
pyrF-PA14(-)-Rec	gacacgacgcgcgacggtcgccgacggcaggcgtgggggaagccgccTCACATgggctctctcgcggcgaatcgaaaacggcgcgcattgtcgcagaatc	-	Recombineering mutagenic oligonucleotide to generate the clean deletion of pyrF in PA14 (antisense-oriented)
pyrF-Pae-F	CGGGTCAGGGCATTCGTCG	60	Forward PCR primer for the diagnose of a clean pyrF deletion into both PA14/PAO1 strains (wild type fragment = 999 bp; ΔpyrF= 300 bp)
pyrF-Pae-R	CCACCGGTACTTGCCGGAG	60	Reverse PCR primer for the diagnose of a clean pyrF deletion into both PA14/PAO1 strains (wild type fragment = 999 bp; ΔpyrF= 300 bp)
nuoN-PA14-spc3-F	gcgcgCACGACGCACCGTTCAACTG	-	Sense-oriented oligonucleotide to construct the specific spacer targeting nuoN gene of PA14. Overhanging nucleotides for its cloning into the Eco31I restriction sites are depicted in blue
nuoN-PA14-spc3-R	aaacCAGTTGAACGGTGCGTCGTGc	-	Antisense-oriented oligonucleotide to construct the specific spacer targeting nuoN gene of PA14. Overhanging nucleotides for its cloning into the Eco31I restriction sites are depicted in blue
nuoN-PA14(+)-Rec	atggctgggcgcagccctttccacccttgcaggacggtagtcgcgaaATGTGAgtcgcccgctccacgaaaaccccgcctcggcggggtttttctttggc	-	Recombineering mutagenic oligonucleotide to generate the clean deletion of nuoN in PA14 (sense-oriented)
nuoN-PA14(-)-Rec	gccaaagaaaaaccccgccgaggcggggttttcgtggagcgggcgacTCACATttcgcgactaccgtcctgcaagggtggaaagggctgcgcccagccat	-	Recombineering mutagenic oligonucleotide to generate the clean deletion of nuoN in PA14 (antisense-oriented)
nuoN-Pae-F	ATCAGCCTGTTCTTCGCCTCG	61	Forward PCR primer for the diagnose of a clean nuoN deletion into PA14 (wild type fragment = 2095 bp; ΔnuoN= 640 bp)
nuoN-Pae-R	GGTTAGCTTCACCGCCCAGTC	61	Reverse PCR primer for the diagnose of a clean nuoN deletion into PA14 (wild type fragment = 2095 bp; ΔnuoN= 640 bp)
19_64050_1_s	gcgcgTCGACGATCAGTACCCGGTA	-	Sense-oriented oligonucleotide to construct the specific spacer targeting the ORF PA14_64050 in P. aeruginosa PA14 and in several clinical isolates. Overhanging nucleotides for its cloning into the Eco31I restriction sites are depicted in blue
19_64050_1_as	aaacTACCGGGTACTGATCGTCGAc	-	Antisense-oriented oligonucleotide to construct the specific spacer targeting the ORF PA14_64050 in P. aeruginosa PA14 and in several clinical isolates. Overhanging nucleotides for its cloning into the Eco31I restriction sites are depicted in blue
19_64050_rec_fwd	ttcgcagcgacgctctgccgcgaagaccacgaaagaagcgcgtcatgATGTAAtggccttttgtcatcagccggtaaccgaacggaaataacctgcggtc	-	Recombineering mutagenic oligonucleotide to generate the clean deletion of gene PA14_64050 in PA14 and in several clinical isolates (sense-oriented)
64050_cPCR_fwd	GTCGGCTTTCAGCGTAGTGG	53	Forward PCR primer for the diagnose of a clean PA14_64050 deletion into PA14 and several clinical isolates (wild type fragment = 2035 bp; ΔPA14_64050= 406 bp)
64050_cPCR_rev	CACCACAGGGTGATTCCCAG	53	Reverse PCR primer for the diagnose of a clean PA14_64050 deletion into PA14 and several clinical isolates (wild type fragment = 2035 bp; ΔPA14_64050= 406 bp)
- Deletion of big DNA segments
nuo-Operon-PA14(+)-Rec	gcccagaacccacgatcttatatatccggtacagaaggagtatcagcATGTGAgtcgcccgctccacgaaaaccccgcctcggcggggtttttctttggc	-	Recombineering mutagenic oligonucleotide to generate the clean deletion of nuoABDEFGHIJKLMN in PA14 (sense-oriented)
nuo-Operon- PA14(-)-Rec	gccaaagaaaaaccccgccgaggcggggttttcgtggagcgggcgacTCACATgctgatactccttctgtaccggatatataagatcgtgggttctgggc	-	Recombineering mutagenic oligonucleotide to generate the clean deletion of nuoABDEFGHIJKLMN in PA14 (antisense-oriented)
nuoA-Pae-F	TTCTCGCAGAGACAGCATTCACG	23	Forward PCR primer for the diagnose of deletion of the whole nuoABDEFGHIJKLMN operon in PA14 (ΔnuoN= 491 bp). The oligonucleotide nuoN-Pae-R was used as the reverse primer
- Small DNA insertions		-
rhlR_PA14_spc6_F	gcgcgGATCAGGGCTTACTGCAATG	-	Sense-oriented oligonucleotide to construct the specific spacer targeting rhlR. This spacer was used for the insertion of a 6xHis tag in rhlR. Overhanging nucleotides for its cloning into the Eco31I restriction sites are depicted in blue
rhlR_PA14_spc6_R	aaacCATTGCAGTAAGCCCTGATCc	-	Antisense-oriented oligonucleotide to construct the specific spacer targeting rhlR. This spacer was used for the insertion of a 6xHis tag in rhlR. Overhanging nucleotides for its cloning into the Eco31I restriction sites are depicted in blue
rhlR_6His_ins_PA14_S_Rec	cgggccaattctgctgtgatgcattttatcgatcagggcttactgcaatgCATCATCACCATCACCACaggaatgacggaggctttttgctgtggtgggacggtttgcgtagcgagat	-	Recombineering mutagenic oligonucleotide to insert a 6xHis tag (green characters) in the N-Terminal DNA sequence of rhlR in PA14 (sense-oriented)
rhlR_6His_ins_PA14_AS_Rec	atctcgctacgcaaaccgtcccaccacagcaaaaagcctccgtcattcctGTGGTGATGGTGATGATGcattgcagtaagccctgatcgataaaatgcatcacagcagaattggcccg	-	Recombineering mutagenic oligonucleotide to insert a 6xHis tag (green characters) in the N-Terminal DNA sequence of rhlR in PA14 (antisense-oriented)
rhlR_PA14-Seq-F2	GGGATGCTCGATGGCTGAAG	60	Forward PCR primer for the diagnose of the insertion of a 6xHis tag in the N-terminal DNA sequence of rhlR (wild type fragment = 202 bp; 6xHis-rhlR fragment= 220 bp)
rhlR_PA14-Seq-R2	TACGCAAACCGTCCCACCAC	61	Reverse PCR primer for the diagnose of the insertion of a 6xHis tag in the N-terminal DNA sequence of rhlR (wild type fragment = 202 bp; 6xHis-rhlR fragment= 220 bp)
- Introduction of SNPs
gyrB_PA14_snp466_spc1-F	gcgcgCGACAAGATGCTCTCCTCCC	-	Sense-oriented oligonucleotide to construct the specific spacer targeting gyrB. This spacer was used for the insertion of a non-permissive (C-->A) SNP in the nucleotide position 1397 of gyrB. Overhanging nucleotides for its cloning into the Eco31I restriction sites are depicted in blue
gyrB_PA14_snp466_spc1-R	aaacGGGAGGAGAGCATCTTGTCGc	-	Antisense-oriented oligonucleotide to construct the specific spacer targeting gyrB. This spacer was used for the insertion of a non-permissive (C-->A) SNP in the nucleotide position 1397 of gyrB. Overhanging nucleotides for its cloning into the Eco31I restriction sites are depicted in blue
gyrB_PA14_S466Y-Rec	gcggccgatgccacagcccagggcggtgatcagcgtaccgacctcctggTaggagagcatcttgtcgaagcgtgccttctcgacgttgaggatcttgccc	-	Recombineering mutagenic oligonucleotide for the introduction of a non-permissive (C-->A) SNP in the nucleotide position 1397 of gyrB.
gyrB_PA14_snp468_spc1-F	gcgcgATGCTCTCCTCCCAGGAGGT	-	Sense-oriented oligonucleotide to construct the specific spacer targeting gyrB. This spacer was used for the insertion of a permissive (G-->T) SNP in the nucleotide position 1404 of gyrB. Overhanging nucleotides for its cloning into the Eco31I restriction sites are depicted in blue
gyrB_PA14_snp468_spc1-R	aaacACCTCCTGGGAGGAGAGCATc	-	Antisense-oriented oligonucleotide to construct the specific spacer targeting gyrB. This spacer was used for the insertion of a permissive (G-->T) SNP in the nucleotide position 1404 of gyrB. Overhanging nucleotides for its cloning into the Eco31I restriction sites are depicted in blue
gyrB_PA14_E468D-Rec	gtactcctcgcggccgatgccacagcccagggcggtgatcagcgtaccgacAtcctgggaggagagcatcttgtcgaagcgtgccttctcgacgttgagg	-	Recombineering mutagenic oligonucleotide for the introduction of a permissive (G-->T) SNP in the nucleotide position 1404 of gyrB.
gyrB_PA14-Seq-F	TCAGCTCGCAGACCAAGGAC	60	Forward PCR primer for the diagnose of the SNP insertions into gyrB (fragment = 763 bp)
gyrB_PA14-Seq-R	TCGTTGACCAGTTTCTCCAGC	58	Forward PCR primer for the diagnose of the SNP insertions into gyrB (fragment = 763 bp)
